# Supplementary material for: Seamless design of thermoelectric modules from single-walled carbon nanotubes
Source: Royal Society of Chemistry journal article supplement (doi:10.1039/d2tc00821a), 2022-01-01
Supplement: d2tc00821a1.pdf [file d2tc00821a1.pdf]

## Supporting Information

# Seamless design of thermoelectric modules from single-walled carbon nanotubes

Patrycja Taborowska<sup>1,\*</sup>, Dawid Janas<sup>1,\*</sup>

<sup>1</sup> Department of Organic Chemistry, Bioorganic Chemistry and Biotechnology, Faculty of Chemistry, Silesian University of Technology, B. Krzywoustego 4, 44-100 Gliwice, Poland

Corresponding authors: [Patrycja.Taborowska@polsl.pl](mailto:Patrycja.Taborowska@polsl.pl), [Dawid.Janas@polsl.pl](mailto:Dawid.Janas@polsl.pl)

Figure S1c shows SWCNT film with a laser-cut pattern for preparing TE modules. Thanks to such processing, the legs could be densely packed to elevate the levels of generated voltage. For K40 laser cutter, 70% maximum power and speed of 10 mm/s were optimum settings for SWCNT film cutting. Rectangular samples used for characterizing electrical conductivity and Seebeck coefficient of pure and doped materials were also cut with the laser cutter.

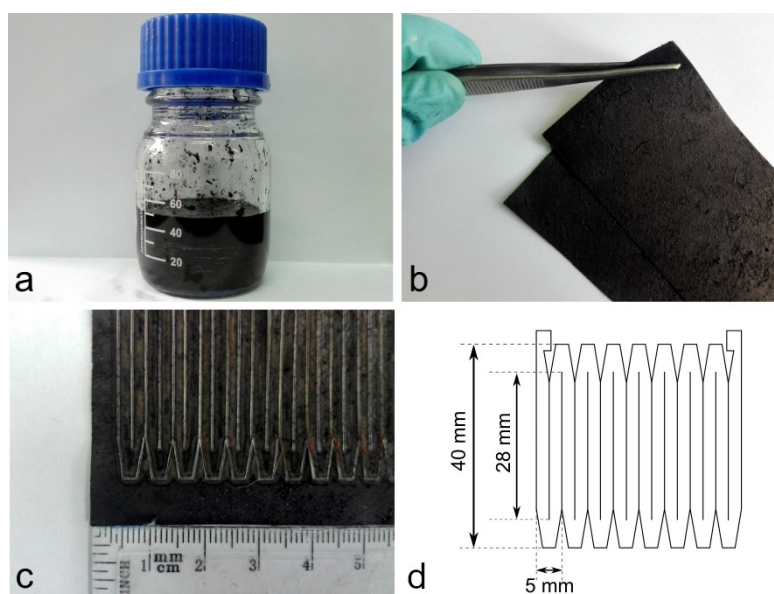

**Figure S1** a) SWCNT dispersion which was used to cast free-standing SWCNT films, b) casted free-standing SWCNT films, c) laser-cut SWCNT film, and d) dimensioning of SWCNT module.

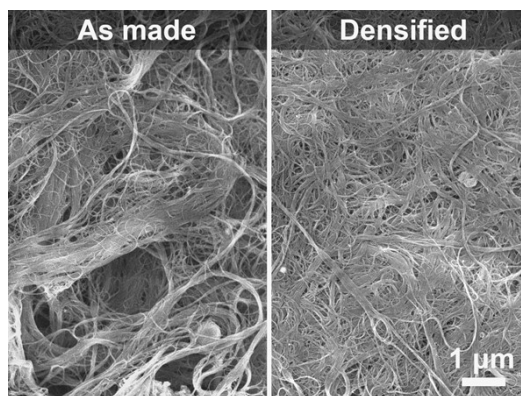

**Figure S2** SEM micrographs SWCNT films: a) as made, and b) after densification.

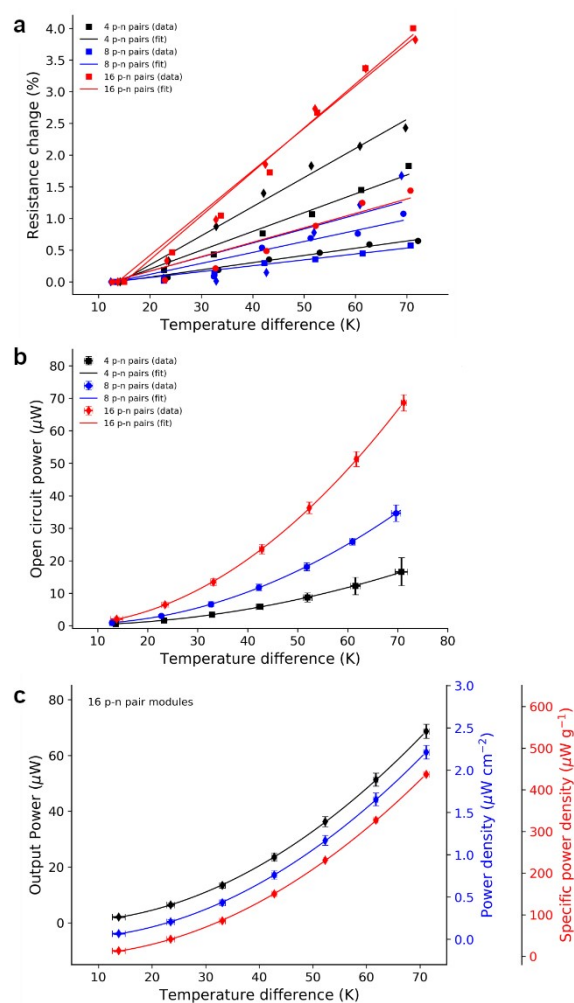

**Figure S3** TE modules' properties measured in open-circuit. a) Resistance change calculated as  $\Delta R/R_{RT}$  for each measured specimen, b) Power values generated by modules under the influence of different  $\Delta T$ , c) Output power, power density, and specific power values for 16 p-n pair modules as a function of temperature.

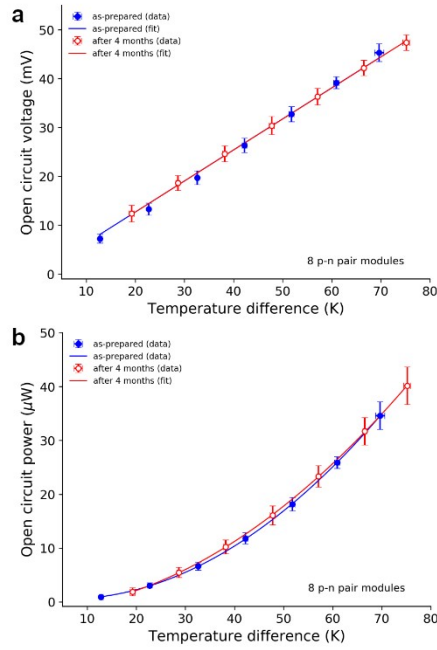

**Figure S4** TE properties of as-prepared and 4 months old SWCNT-based modules: a) output voltage, b) output power.

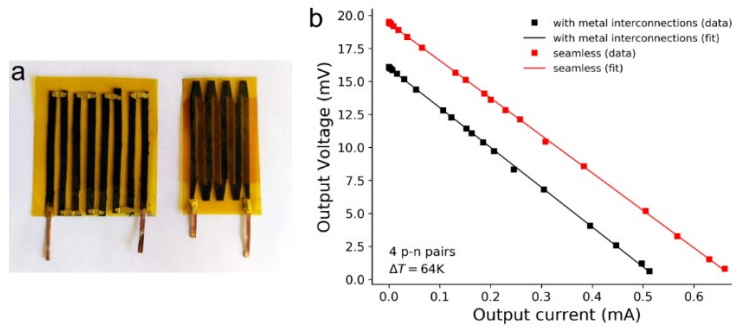

**Figure S5** a) SWCNT film-based TE modules containing 4 p-n pairs with metal interconnections (typical approach; left) and seamless (this work; right), b) I-V characteristics of modules shown in panel a).
